# Supplementary material
Source: ML conference proceedings conference paper supplement (https://proceedings.neurips.cc/paper_files/paper/2018/hash/01161aaa0b6d1345dd8fe4e481144d84-Abstract.html)
Supplement: Supplementary file [file 01161aaa0b6d1345dd8fe4e481144d84-Supplemental.zip]

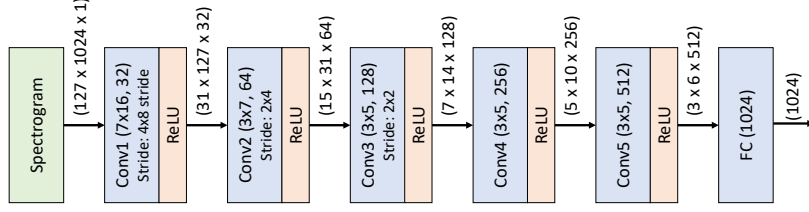

**Figure 1: Audio encoder.** Detailed representation of audio encoder architecture. Forward pass is left to right.

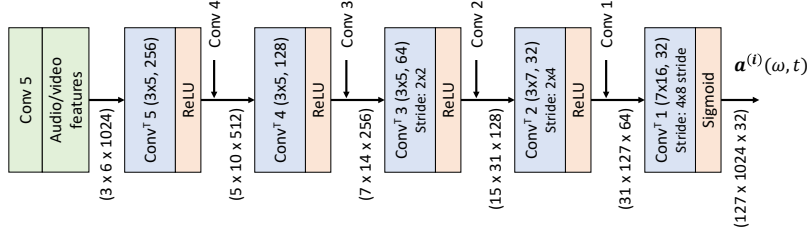

**Figure 2: Separation.** Detailed representation of source separation architecture. Forward pass is left to right.

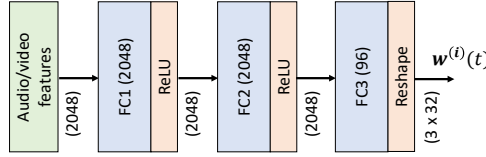

**Figure 3: Localization.** Detailed representation of localization architecture. Forward pass is left to right.

## A Appendix

### A.1 Network Architectures

Both video and flow encoders use the ResNet-18 architecture up to the last convolutional layer. Then, a  $1 \times 1$  convolutional layer reduces the dimensionality of the feature maps to 128, the resulting maps of size  $7 \times 14 \times 128$  are flattened, and a fully-connected layer computes a 512-dimensional feature vector. Flow features are extracted from flow maps represented by three channels: the X and Y displacements, as well as the magnitude of the corresponding velocity vector. The audio encoder is a 5 layer CNN applied to the input STFT and detailed in Fig. 1. The audio encoder outputs a 1024-dimensional feature representation for the input audio.

The concatenated audio and video features are then fed to the separation and localization blocks, shown in Figs. 2 and 3, respectively. The separation block (Fig. 2) outputs the  $k = 32$  frequency activation maps  $\mathbf{a}^{(i)}(\omega, t)$  to be used for modulation of the input STFT  $\Phi(t; \omega)$ , and separated wave-forms  $f^i(t)$  are computed by inverse STFT, i.e.,

$$f^i(t) = STFT^{-1} \left\{ \mathbf{a}^{(i)}(\omega, t) \cdot \Phi(t; \omega) \right\}$$

In our implementation, the number of frequency components is 1024. The localization block (Fig. 3) outputs, for each of the  $k = 32$  sources, the 3 localization weights  $\mathbf{w}^i$  associated with the three ambisonics channels  $\phi = (\phi_x, \phi_y, \phi_z)$ .

Given the localization weights  $\mathbf{w}^i(t)$  and separated wave-forms  $f^i(t)$ , the FOA are generated by

$$\phi(t) = \sum_{i=1}^k \mathbf{w}^i(t) f^i(t).$$
